# Supplementary material for: Resolution dependence of uncertainties in gridded emissioninventories: a case study in Hebei, China
Source: Copernicus journal article supplement (doi:10.5194/acp-2016-907), 2016-10-24
Supplement: Supplementary file 1 [file acp-2016-907-supplement.pdf]

# SUPPLEMENTARY

**Title:** Resolution dependence of uncertainties in gridded emission inventories: a case study in Hebei, China

**Authors:** Bo Zheng, Qiang Zhang, Dan Tong, Chuchu Chen, Chaopeng Hong, Meng Li, Guannan Geng, Yu Lei, Hong Huo, Kebin He

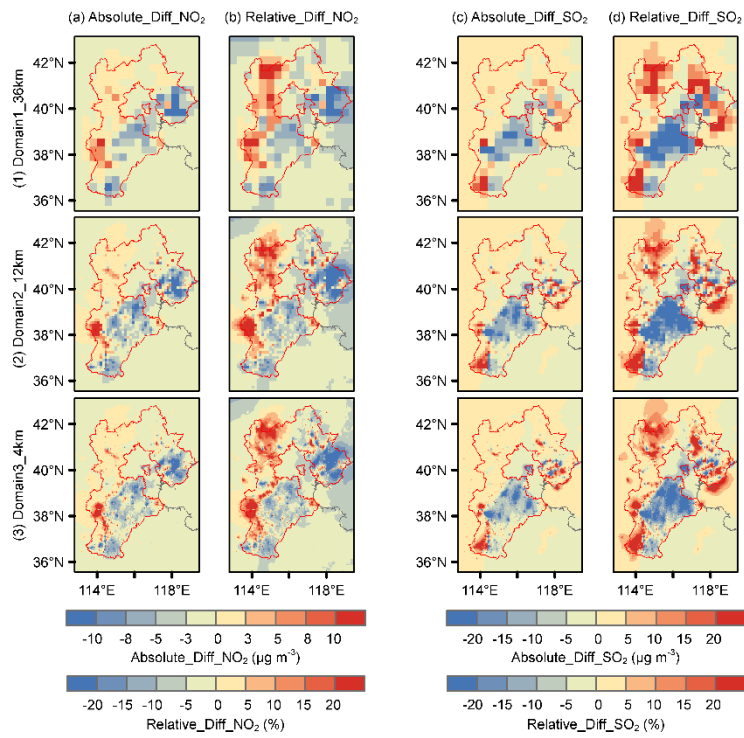

Figure S1 Comparative SO<sub>2</sub> and NO<sub>2</sub> maps modeled using S1 and S2 (S1 subtracted from S2)

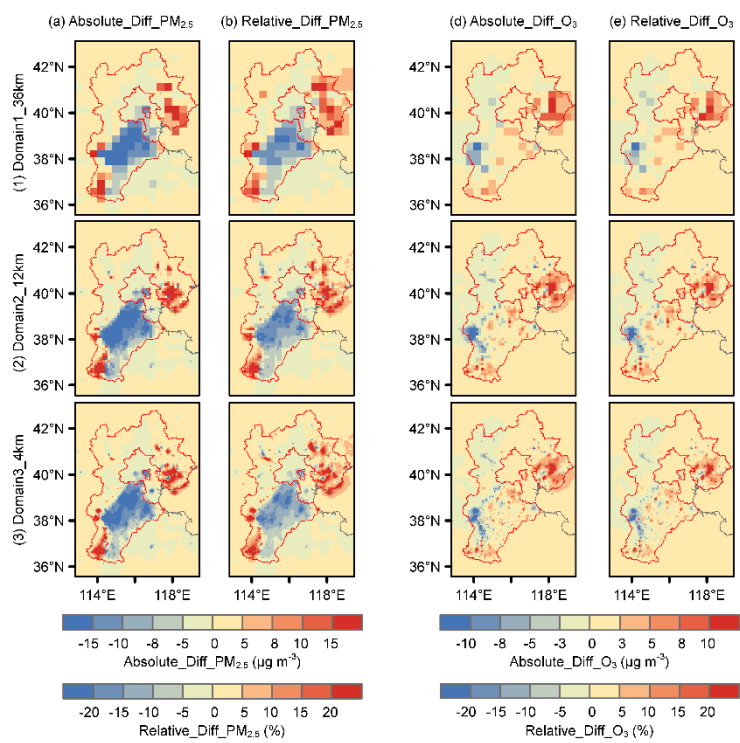

Figure S2 Comparative PM<sub>2.5</sub> and O<sub>3</sub> maps modeled using S1 and S2 (S1 subtracted from S2)
